# Supplementary material
Source: PubMed Central journal article supplement (PMC4504250)
Supplement: chest_146_4_suppl_e103S_ds01.pdf [file chest_146_4_suppl_e103S_ds01.pdf]

## Business and Continuity of Operations

### Care of the Critically Ill and Injured During Pandemics and Disasters: CHEST Consensus Statement

Pritish K. Tosh, MD; Henry Feldman, MD; Michael D. Christian, MD, FRCPC, FCCP; Asha V. Devereaux, MD, MPH, FCCP;  
Niranjan Kissoon, MBBS, FRCPC; and Jeffrey R. Dichter, MD; on behalf of the Task Force for Mass Critical Care

CHEST 2014;146(4\_Suppl):e103S-e1

*Online supplements are not copyedited prior to posting.*

**e-Appendix 1: Appendix Shortages of Critical Care Medications in the United States 2010 (Source: American Society of Health-System Pharmacists [www.ashp.org](http://www.ashp.org))**

e-Table 1. Shortages of Critical Care Medications in the United States 2010 – 2013 (Source American Society of Health-System Pharmacists [www.ashp.org](http://www.ashp.org))

| Generic Name                                          | Category  | Manufacturer(s) and product in shortage                                                                                                                                                                                                                                                                                                    | Alternative Source / Formulations Available | Alternative medications of similar route and mechanism of action        | Start of Shortage | End of Shortage |
|-------------------------------------------------------|-----------|--------------------------------------------------------------------------------------------------------------------------------------------------------------------------------------------------------------------------------------------------------------------------------------------------------------------------------------------|---------------------------------------------|-------------------------------------------------------------------------|-------------------|-----------------|
| <a href="#">Fentanyl Injection</a>                    | Analgesic | <b>Akorn</b> (50mcg/mL 2 mL ampules 10 and 25 counts, 50mcg/mL 5 mL ampules 10 and 25 counts, 50mcg/mL 20 mL ampules), <b>Hospira</b> (50mcg/mL 5 mL, 10 mL, and 20 mL ampules, 50mcg/mL 2 mL, 10 mL, and 50 mL vials, 50mcg/mL 2 ML Carpuject syringe), <b>West-Ward</b> (50mcg/mL 2 mL and 50 mL vials, 50mcg/mL 5 mL and 20 mL ampules) | Yes                                         | alfentanil, sufentanil, remifentanil, dilaudid, hydromorphone, morphine | 11/2/2011         | ongoing         |
| <a href="#">Hydromorphone Hydrochloride Injection</a> | Analgesic | <b>Purdue</b> (250 mg vial powder for injection, 10mg/mL 50 mL vials), <b>Hospira</b> (2mg/mL 1 mL vial)                                                                                                                                                                                                                                   | Yes                                         | alfentanil, sufentanil, remifentanil, fentanyl, dilaudid, morphine      | 5/31/2011         | ongoing         |

|                                                   |           |                                                                                                                                                                                                                                                                                                                                                                                                                                                                                              |     |                                                                                   |           |           |
|---------------------------------------------------|-----------|----------------------------------------------------------------------------------------------------------------------------------------------------------------------------------------------------------------------------------------------------------------------------------------------------------------------------------------------------------------------------------------------------------------------------------------------------------------------------------------------|-----|-----------------------------------------------------------------------------------|-----------|-----------|
| <a href="#">Ketorolac Tromethamine Injection</a>  | Analgesic | <b>West-Ward</b> (15mg/mL 1 mL vial 25 count, 30mg/mL 1 mL vial 25 count, 30mg/mL 2 mL vial for IM use 25 count), <b>Bedford</b> (15mg/mL 1 mL vial 10 count, 30mg/mL 1 mL vial 10 count, 30mg/mL 10 mL vial 10 count, 30mg/mL 2 mL vial for IM use 10 count), <b>Hospira</b> (15mg/mL 1 mL vial 25 count, 15mg/mL 1 mL Novaplus vial 25 count, 30mg/mL 2 mL vials for IM use 10 count), <b>Wockhardt</b> (15mg/mL 1 mL vial 10 count and 25 count, 30mg/mL 1 mL vial 10 count and 25 count) | Yes | none                                                                              | 1/28/2011 | ongoing   |
| <a href="#">Meperidine Injection</a>              | Analgesic | <b>Hospira</b> (50mg/mL vial)                                                                                                                                                                                                                                                                                                                                                                                                                                                                | Yes | alfentanil, sufentanil, remifentanil, fentanyl, dilaudid, hydromorphone, morphine | 3/20/2012 | 6/3/2013  |
| <a href="#">Methadone Hydrochloride Injection</a> | Analgesic | <b>Mylan</b> (20 mL vial)                                                                                                                                                                                                                                                                                                                                                                                                                                                                    | No  | alfentanil, sufentanil, remifentanil, fentanyl, dilaudid, hydromorphone, morphine | 12/4/2012 | 3/20/2013 |
| <a href="#">Morphine Injections</a>               | Analgesic | <b>APP</b> (0.5mg/mL 2 mL ampule 10 count, 0.5mg/mL 10 mL vial 5 count, 0.5mg/mL 10 mL ampule, 1mg/mL 2mL ampule 10 count, 1mg/mL 10 mL vial, 1mg/mL 10 mL ampule), <b>Hospira</b> (0.5mg/mL 10 mL vial, 25mg/mL 4 mL vial, 50mg/mL 50 mL vial)                                                                                                                                                                                                                                              | Yes | alfentanil, sufentanil, remifentanil, fentanyl, dilaudid, hydromorphone           | 1/6/2011  | ongoing   |

|                                                                            |               |                                                                                                                                                                                                                                               |     |                                                                       |            |           |
|----------------------------------------------------------------------------|---------------|-----------------------------------------------------------------------------------------------------------------------------------------------------------------------------------------------------------------------------------------------|-----|-----------------------------------------------------------------------|------------|-----------|
| <a href="#">Oxycodone Immediate Release Tablets and Capsules</a>           | Analgesic     | <b>Xanodyne</b> (Roxicodone immediate-release tablets 5mg unit-dose tablets 100 count), <b>Mallinckrodt</b> (oxycodone immediate-release capsules 5mg 100 count), <b>MidLothian Labs</b> (oxycodone immediate-release capsules 5mg 100 count) | Yes | morphine, hydromorphone, hydrocodone, codeine                         | 3/23/2011  | 6/25/2012 |
| <a href="#">Sufentanil Injection</a>                                       | Analgesic     | <b>West-Ward</b> (50mcg/mL 2 mL ampule), <b>Hospira</b> (50mcg/mL 1mL ampule, 1 mL Novaplus ampule, and 1 mL vial, 2mL ampule, 2 mL Novaplus ampule, and 2 mL vial, 5mL ampule, 5 mL Novaplus ampule, and 5 mL vial)                          | Yes | alfentanil, fentanyl, remifentanil, dilaudid, hydromorphone, morphine | 11/9/2011  | ongoing   |
| <a href="#">Acyclovir Capsules and Tablets</a>                             | Antiinfective | <b>Ranbaxy</b> (200mg capsules 500 count)                                                                                                                                                                                                     | Yes | none                                                                  | 11/18/2009 | 7/16/2013 |
| <a href="#">Acyclovir Sodium Injection</a>                                 | Antiinfective | <b>Bedford</b> (lyophilized powder for injection 500 mg vial and 1 g vial), <b>APP</b> (lyophilized powder for injection 500 mg vial, 50mg/ml solution for injection 10 mL vial and 20 ml vial)                                               | No  | none                                                                  | 11/13/2012 | ongoing   |
| <a href="#">Acyclovir Topical Cream and Ointment</a>                       | Antiinfective | <b>Valeant Pharmaceuticals</b> (5% ointment 30g, 5% cream 2 g and 5 g)                                                                                                                                                                        | Yes | none                                                                  | 8/7/2012   | 1/14/2013 |
| <a href="#">Amikacin Injection</a>                                         | Antiinfective | <b>Bedford</b> (250mg/mL 2 mL vials package of 10, 250mg/mL 4 mL vials package of 10), <b>Teva</b> (250mg/mL 2 mL vials package of 10, 250mg/mL 4 mL vials package of 10)                                                                     | No  | gentamicin, tobramycin, streptomycin                                  | 7/6/2010   | ongoing   |
| <a href="#">Amphotericin B Cholesteryl Sulfate Lipid Complex Injection</a> | Antiinfective | <b>Alkopharma</b> (lyophilized powder 50 mg vial and 100 mg vial)                                                                                                                                                                             | Yes | none                                                                  | 2/15/2012  | ongoing   |
| <a href="#">Amphotericin B Injection</a>                                   | Antiinfective | <b>X-Gen</b> (50mg Novaplus vials)                                                                                                                                                                                                            | Yes | none                                                                  | 10/4/2011  | 12/8/2011 |

|                                              |               |                                                                                                                                                                                                                                                                                                                                                                                                                  |     |                                    |            |           |
|----------------------------------------------|---------------|------------------------------------------------------------------------------------------------------------------------------------------------------------------------------------------------------------------------------------------------------------------------------------------------------------------------------------------------------------------------------------------------------------------|-----|------------------------------------|------------|-----------|
| <a href="#">Ampicillin Sulbactam</a>         | Antiinfective | <b>Auromedics</b> (3 g vial 10 count), <b>Hospira</b> (1.5 g and 3 g vial 10 count, 1.5 g and 3 g ADD-Vantage vial 10 count, 1.5 g and 3 g Novaplus ADD-Vanta vial 10 count, 15 g bulk vial 1 count), <b>Mylan</b> (1.5g and 3 g vial 10 count), <b>Pfizer</b> (1.5 g vial 10 count), <b>Sagent</b> (3 g vial 10 count and 15 g bulk vial 1 count), <b>Sandoz</b> (3 g vial 10 count and 15 g bulk vial 1 count) | Yes | piperacillin-tazobactam            | 6/24/2011  | ongoing   |
| <a href="#">Azithromycin Injection</a>       | Antiinfective | <b>Apotex</b> (500 mg vial package of 10), <b>Pfizer</b> (500 mg vial)                                                                                                                                                                                                                                                                                                                                           | Yes | clarithromycin, erythromycin       | 1/2/2013   | ongoing   |
| <a href="#">Azithromycin Suspension</a>      | Antiinfective | <b>Sandoz</b> (100mg/5mL 15 mL bottle, 200mg/5mL 15 mL, 22.5 mL, and 30 mL bottles), <b>Pfizer</b> (2g/60mL adult and pediatric formulation bottles)                                                                                                                                                                                                                                                             | Yes | erythromycin, clarithromycin       | 10/13/2009 | 8/17/2010 |
| <a href="#">Aztreonam Injection</a>          | Antiinfective | <b>APP</b> (1 g and 2 g vials)                                                                                                                                                                                                                                                                                                                                                                                   | Yes | none                               | 1/23/2012  | ongoing   |
| <a href="#">Cefaclor Suspension</a>          | Antiinfective | <b>Ranbaxy</b> (cefaclor suspension)                                                                                                                                                                                                                                                                                                                                                                             | Yes | cefuroxime                         | 8/20/2009  | 5/15/2013 |
| <a href="#">Cefazolin Injection</a>          | Antiinfective | <b>Bbraun</b> (1g/50mL premix, 2g/50mL premix), <b>Apotex</b> (1 g 10 count, 1 g 25 count, 10 g 1 count), <b>Hospira</b> (1 g 25 count, 10 g 10 count), <b>Sandoz</b> (10 g 10 count)                                                                                                                                                                                                                            | Yes | none                               | 1/10/2013  | ongoing   |
| <a href="#">Cefotaxime Injection</a>         | Antiinfective | <b>West-Ward</b> (500 mg, 1g, and 2 g vials)                                                                                                                                                                                                                                                                                                                                                                     | Yes | ceftazidime, ceftriaxone, cefepime | 1/31/2013  | ongoing   |
| <a href="#">Cefotetan Disodium Injection</a> | Antiinfective | <b>Bbraun</b> (cefotetan injection)                                                                                                                                                                                                                                                                                                                                                                              | Yes | cefoxitin                          | 3/12/2009  | 9/16/2011 |

|                                             |               |                                                                                                                                                                                                                                                                                 |     |                                   |            |         |
|---------------------------------------------|---------------|---------------------------------------------------------------------------------------------------------------------------------------------------------------------------------------------------------------------------------------------------------------------------------|-----|-----------------------------------|------------|---------|
| <a href="#">Cefpodoxime</a>                 | Antiinfective | <b>Aurobindo</b> (50mg/5mL 50 mL and 100 mL suspension), <b>Ranbaxy</b> (100 mg tablet 20 count, 200 mg tablet 20 and 100 count, 50mg/mL 50 mL and 100 mL suspension, 100mg/mL 50 mL and 100 mL suspension), <b>Sandoz</b> (50mg/5mL 50 mL and 100 mL suspension)               | Yes | cefixime, cefdinir                | 3/20/2011  | ongoing |
| <a href="#">Ceftazidime Injection</a>       | Antiinfective | <b>Corvis</b> (500 mg vials package of 10, 1 g vials package of 25), <b>Sagent</b> (1 g vials package of 25)                                                                                                                                                                    | Yes | cefotaxime, ceftriaxone, cefepime | 11/29/2011 | ongoing |
| <a href="#">Cefuroxime Sodium Injection</a> | Antiinfective | <b>Covis</b> (750 mg and 1.5 g vials package of 10, 750mg/50mL premix package of 24), <b>Sagent</b> (750 mg and 1.5 g vials package of 25, 7.5 g bulk vial package of 10), <b>West-Ward</b> (7.5 g bulk vial package of 10)                                                     | Yes | cefoxitin, cefotetan              | 1/25/2013  | ongoing |
| <a href="#">Cephalexin Oral Suspension</a>  | Antiinfective | <b>Orchid/Karalax</b> (125mg/5mL 100 mL and 200 mL, 250mg/5mL 100 mL and 200 mL), <b>Lupin</b> (125mg/5mL 100 mL and 200 mL, 250mg/mL 100 mL and 200 mL), <b>Ranbaxy</b> (125mg/5mL 100 mL and 200 mL, 250 mg/5mL 100 mL and 200 mL), <b>Teva</b> (250mg/5mL 100 mL and 200 mL) | Yes | cefadroxil                        | 7/19/2013  | ongoing |
| <a href="#">Cidofovir Injection</a>         | Antiinfective | <b>Gilead</b> (75mg/mL 5mL vials), <b>Heritage</b> (75mg/5mL 5mL vials)                                                                                                                                                                                                         | Yes | foscarnet, ganciclovir            | 2/15/2013  | ongoing |

|                                                          |               |                                                                                                                                                                                                                                                                                                                       |     |                           |            |          |
|----------------------------------------------------------|---------------|-----------------------------------------------------------------------------------------------------------------------------------------------------------------------------------------------------------------------------------------------------------------------------------------------------------------------|-----|---------------------------|------------|----------|
| <a href="#">Ciprofloxacin Immediate-Release Tablets</a>  | Antiinfective | <b>Carlsbad Technologies</b> (250 mg 100 and 1000 counts, 500 mg 100 and 500 counts, 750 mg 100 and 400 counts), <b>Marlex</b> (500 mg 100 count), <b>Ranbaxy</b> (250 mg 100 count, 500 mg 100 count, 750 mg 50 and 100 count), <b>UDL</b> (250 mg 100 count, 500 mg 100 count), <b>West-Ward</b> (500 mg 100 count) | Yes | levofloxacin              | 10/15/2009 | ongoing  |
| <a href="#">Ciprofloxacin Injection</a>                  | Antiinfective | <b>Claris</b> (2mg/mL 200 mL premixed bag), <b>Sagent</b> (2mg/mL 100 mL and 200 mL premixed bag)                                                                                                                                                                                                                     | Yes | levofloxacin              | 6/3/2010   | ongoing  |
| <a href="#">Clarithromycin Immediate-Release Tablets</a> | Antiinfective | <b>Apotex</b> (250 mg 60 count, 500 mg 60 count), <b>Ranbaxy</b> (250 mg 60 and 100 count, 500 mg 60 and 100 count), <b>Abbott</b> (250 mg 100 count), <b>Mylan</b> (250 mg 60 count, 500 mg 60 count), <b>UDL</b> (500 mg 100 count)                                                                                 | Yes | azithromycin, doxycycline | 1/25/2011  | ongoing  |
| <a href="#">Clindamycin Injection</a>                    | Antiinfective | <b>APP</b> (150mg/mL 2 mL vial), <b>Hospira</b> (150mg/mL 6 mL vial, 4mL ADD-Vantage vials, and 60 mL bulk vials), <b>Sandoz</b> (300mg/50mL, 600mg/50mL, and 900mg/50mL premix vials)                                                                                                                                | Yes | none                      | 6/3/2013   | ongoing  |
| <a href="#">Dalfopristin/Quinupristin Injection</a>      | Antiinfective | <b>Pfizer</b> (500mg vials 10 count)                                                                                                                                                                                                                                                                                  | No  | none                      | 6/28/2013  | 8/1/2013 |

[Doxycycline Capsules and Tablets](#)

Antiinfective

**Heritage** (50 mg tablets 100 count), **Lannett** (100 mg tablets 50 and 250 counts), **Major** (50 mg capsules 50 count, 100 mg capsules 50, 100, and 500 counts, 100 mg tablets, 50, 100, and 500 counts), **Teva** (20 mg tablets 100 and 500 counts), **VersaPharm** (100 mg capsules 14 count), **Watson** (50 mg capsules 50 count, 100 mg capsules 50 and 500 counts), **West-Ward** (100 mg capsules, 20 count)

Yes

minocycline, tetracycline 4/9/2013

ongoing

[Doxycycline Hyclate Injection](#)  
[Erythromycin Lactobionate Injection](#)

Antiinfective

**Bedford** (100mg vial)  
**Hospira** (500 mg vials 10 count package, 500 mg Add-Vantage vials 10 count)

Yes

tigecycline 5/24/2010

8/21/2012

Antiinfective

azithromycin,  
clarithromycin

9/3/2003

1/15/2013



|                                            |               |                                                                                                                                                                                                                                                                                                                                                                                                                                                                                                                                                                                                                                                                                                                                                     |     |                                          |           |           |
|--------------------------------------------|---------------|-----------------------------------------------------------------------------------------------------------------------------------------------------------------------------------------------------------------------------------------------------------------------------------------------------------------------------------------------------------------------------------------------------------------------------------------------------------------------------------------------------------------------------------------------------------------------------------------------------------------------------------------------------------------------------------------------------------------------------------------------------|-----|------------------------------------------|-----------|-----------|
| <a href="#">Erythromycin Oral Products</a> | Antiinfective | <b>Abbott</b> (Erythromycin stearate filmtab 250mg tablets 500 count, erythromycin base filmtab 250mg tablets 500 count, erythromycin delayed-release 250mg capsules 500 count, erythromycin delayed-release 250mg tablets 500 count and 333mg tablets 500 count, erythromycin ethylsuccinate 400mg Filmtab 100 count, 500 count, and 1000 count, erythromycin ethylsuccinate 200 Liquid 1 pint and 100 mL, erythromycin ethylsuccinate 400 liquid 1 pint and 100 mL, EryPed oral suspension 200mg/5mL 5 mL unit dose 100 count, EryPed oral suspension 200mg/5mL 200 mL, EryPed for oral suspension 400mg/5mL 5 mL unit dose 100 count, EryPed for oral suspension 400mg/5mL 60 mL and 200 mL, EryPed Drops for oral suspension 100mg/2.5mL 50 mL) | Yes | azithromycin, clarithromycin             | 3/11/2011 | 4/1/2011  |
| <a href="#">Fluconazole Injection</a>      | Antiinfective | <b>Bedford</b> (2mg/mL 100 mL and 200 mL vials, 2mg/mL 200 mL premixed bag), <b>Teva</b> (2mg/mL 100 mL and 200 mL vials, 2mg/mL 100 mL and 200 mL premixed bags)                                                                                                                                                                                                                                                                                                                                                                                                                                                                                                                                                                                   | Yes | itraconazole, voriconazole, posaconazole | 6/1/2010  | ongoing   |
| <a href="#">Foscarnet Injection</a>        | Antiinfective | <b>Hospira</b> (24mg/mL 250 mL and 500 mL packages of 12                                                                                                                                                                                                                                                                                                                                                                                                                                                                                                                                                                                                                                                                                            | No  | Ganciclovir, Cidovovir                   | 7/15/2010 | 2/27/2013 |

|                                                       |               |                                                                                                                                                                                                            |     |                                         |            |            |
|-------------------------------------------------------|---------------|------------------------------------------------------------------------------------------------------------------------------------------------------------------------------------------------------------|-----|-----------------------------------------|------------|------------|
| <a href="#">Gentamicin injection</a>                  | Antiinfective | <b>Baxter</b> (1mg/mL 100mg/100mL premixed bags), <b>Hospira</b> (1.2mg/mL 60mg/50mL premixed bags, 1.6mg/mL 80mg/50mL premixed bags, 0.8mg/mL 80mg/100mL premixed bags, 1mg/mL 100mg/100mL premixed bags) | Yes | amikacin, tobramycin                    | 5/17/2011  | ongoing    |
| <a href="#">Isoniazid Injection</a>                   | Antiinfective | <b>Sandoz</b> (Nydravid injection)                                                                                                                                                                         | No  | none                                    | 1/29/2009  | 8/11/2010  |
| <a href="#">Ivermectin Tablets</a>                    | Antiinfective | <b>Merck</b> (Stromectol 3 mg tablets)                                                                                                                                                                     | No  | none                                    | 12/17/2010 | 12/22/2010 |
| <a href="#">Levofloxacin Injection</a>                | Antiinfective | <b>Sandoz</b> (levofloxacin injection), <b>Janssen</b> (Levaquin vials)                                                                                                                                    | Yes | ciprofloxacin, moxifloxacin             | 7/26/2011  | 10/12/2012 |
| <a href="#">Meropenem Injection</a>                   | Antiinfective | <b>APP</b> (meropenem injection)                                                                                                                                                                           | Yes | doripenem, ertapenem, imipenem          | 10/24/2012 | 6/19/2013  |
| <a href="#">Metronidazole Injection</a>               | Antiinfective | <b>Claris</b> (500mg/100mL 24 count), <b>Hospira</b> (500mg/100mL 80 count)                                                                                                                                | Yes | oral metronidazole                      | 6/1/2010   | ongoing    |
| <a href="#">Metronidazole tablets and capsules</a>    | Antiinfective | <b>Major</b> (250mg 100 count), <b>Watson</b> (250mg 100 count, 500mg 50 count)                                                                                                                            | Yes | none                                    | 1/14/2011  | 2/15/2012  |
| <a href="#">Nafcillin Sodium Injection</a>            | Antiinfective | <b>Sandoz</b> (1g vials)                                                                                                                                                                                   | Yes | oxacillin                               | 11/12/2010 | 5/5/2011   |
| <a href="#">Oseltamivir Phosphate Oral Suspension</a> | Antiinfective | <b>Genentech</b> (6mg/mL 60 mL bottles)                                                                                                                                                                    | Yes | zanamivir                               | 1/11/2013  | ongoing    |
| <a href="#">Penicillin G Sodium Injection</a>         | Antiinfective | <b>Sandoz</b> (5 million unit vials)                                                                                                                                                                       | Yes | none                                    | 6/1/2011   | 6/29/2011  |
| <a href="#">Pentamidine Isethionate</a>               | Antiinfective | <b>APP</b> (Pentam300 for injection 300 mg 15 mL vial, NebuPent for inhalation 300 mg 15 mL vial)                                                                                                          | No  | none                                    | 8/31/2011  | 1/9/2013   |
| <a href="#">Polymyxin B Sulfate Injection</a>         | Antiinfective | <b>APP</b> (500,000 units per vial 10 count), <b>Beford</b> (500,000 units per vial 10 count), <b>Sagent</b> (500,000 units per vial 10 count), <b>X-Gen</b> (500,000 units per vial 1 count)              | Yes | colistin                                | 11/15/2012 | ongoing    |
| <a href="#">Posaconazole Oral Suspension</a>          | Antiinfective | <b>Merck</b> (Noxafil oral suspension)                                                                                                                                                                     | No  | voriconazole, itraconazole, fluconazole | 11/4/2010  | 2/1/2011   |

|                                                         |               |                                                                                                                                                                                                                        |     |                                  |           |           |
|---------------------------------------------------------|---------------|------------------------------------------------------------------------------------------------------------------------------------------------------------------------------------------------------------------------|-----|----------------------------------|-----------|-----------|
| <a href="#">Primaquine Phosphate</a>                    | Antiinfective | <b>Sanofi-Aventis</b> (26.3mg tablets 100 count)                                                                                                                                                                       | No  | none                             | 8/19/2011 | 3/7/2012  |
| <a href="#">Rifampin and Isoniazid Capsules</a>         | Antiinfective | <b>Sanofi-Aventis</b> (Rifamate capsules rifampin 300mg/isoniazid 150mg 60 count)                                                                                                                                      | No  | Yes                              | 3/22/2013 | 7/16/2013 |
| <a href="#">Rifampin for Injection</a>                  | Antiinfective | <b>Akorn</b> (600 mg lyophilized vial), <b>Bedford</b> (600 mg lyophilized vial), <b>Pfizer</b> (600 mg lyophilized vial, 600 mg Novaplus lyophilized vial)                                                            | Yes | none                             | 3/22/2013 | ongoing   |
| <a href="#">Streptomycin Injection</a>                  | Antiinfective | <b>X-Gen</b> (1g vial 10 count)                                                                                                                                                                                        | No  | gentamicin, tobramycin, amikacin | 9/13/2011 | 11/8/2011 |
| <a href="#">Sulfamethoxazole/Trimethoprim Injection</a> | Antiinfective | <b>Teva</b> (sulfamethoxazole 80mg/trimethoprim 16 mg/mL 5 mL vial)                                                                                                                                                    | Yes | none                             | 5/10/2010 | ongoing   |
| <a href="#">Tetracycline Capsules</a>                   | Antiinfective | <b>Teva</b> (250 mg 100 count, 100 count unit dose, and 1000 count, 500 mg 100 count, 100 count unit dose, and 1000 count unit dose), <b>Watson</b> (250 mg 100 count and 1000 count, 500 mg 100 count and 1000 count) | Yes | doxycycline, minocycline         | 8/11/2011 | ongoing   |
| <a href="#">Ticarcillin Clavulanate</a>                 | Antiinfective | <b>GlaxoSmithKline</b> (3.1 g ADD-Vantage vial and 3.1 g vial)                                                                                                                                                         | Yes | piperacillin                     | 6/6/2011  | ongoing   |
| <a href="#">Tobramycin Injection</a>                    | Antiinfective | <b>APP</b> (40mg/mL 30 mL vial), <b>Hospira</b> (10mg/mL 2 mL vial, 40mg/mL 2 mL and 50 mL vials, 80mg/100mL premixed bags), <b>Teva</b> (40mg/mL 2 mL and 30 mL vial)                                                 | Yes | gentamicin, amikacin             | 6/14/2011 | ongoing   |
| <a href="#">Vancomycin Hydrochloride Injection</a>      | Antiinfective | <b>APP</b> (5 g and 10 g vials), <b>Hospira</b> (5 g and 10 g vials, 500 mg Add-Vantage vials), <b>Mylan</b> (500 mg and 1 g vials)                                                                                    | Yes | daptomycin, linezolid            | 8/13/2013 | ongoing   |

|                                                               |                  |                                                                                                                                                                                                                  |     |                                         |           |           |
|---------------------------------------------------------------|------------------|------------------------------------------------------------------------------------------------------------------------------------------------------------------------------------------------------------------|-----|-----------------------------------------|-----------|-----------|
| <a href="#">Voriconazole Tablets</a>                          | Antiinfective    | <b>Greenstone</b> (50mg and 200 mg 30 count), <b>Sandoz</b> (50mg and 200mg 30 count)                                                                                                                            | Yes | fluconazole, itraconazole, posaconazole | 12/6/2012 | 4/19/2013 |
| <a href="#">Dexamethasone Sodium Phosphate</a>                | Antiinflammatory | <b>American Regent</b> (4mg/mL 1 mL single dose vial, 5 mL and 30 mL multiple dose vials), <b>Pfizer</b> (4 mg/mL 1 mL and 5 mL vials)                                                                           | Yes | methylprednisolone, hydrocortisone      | 1/15/2013 | ongoing   |
| <a href="#">Hydrocortisone Sodium Succinate Injection</a>     | Antiinflammatory | <b>Hospira</b> (100 mg vial)                                                                                                                                                                                     | Yes | dexamethasone, methylprednisolone       | 5/24/2012 | ongoing   |
| <a href="#">Methylprednisolone Acetate Injection</a>          | Antiinflammatory | <b>Sandoz</b> (40mg/mL 1 mL and 10 mL vials, 40mg/mL 1 mL vials package of 10, 80mg/mL 1 mL and 5 mL vials, 80mg/mL 1mL vials package of 10), <b>Teva</b> (40mg/mL 1 mL vials, 40mg/mL 1 mL vials package of 25) | Yes | dexamethasone, hydrocortisone           | 5/22/2012 | ongoing   |
| <a href="#">Methylprednisolone Sodium Succinate Injection</a> | Antiinflammatory | <b>APP</b> (40 mg and 1 g single dose vials)                                                                                                                                                                     | Yes | dexamethasone, hydrocortisone           | 5/13/2013 | ongoing   |

|                                                    |                  |                                                                                                                                                                                                                                                                                                                                                                                                                                                                                                                                                                                                                                                                                                                                                                                                                                                                      |     |                               |            |         |
|----------------------------------------------------|------------------|----------------------------------------------------------------------------------------------------------------------------------------------------------------------------------------------------------------------------------------------------------------------------------------------------------------------------------------------------------------------------------------------------------------------------------------------------------------------------------------------------------------------------------------------------------------------------------------------------------------------------------------------------------------------------------------------------------------------------------------------------------------------------------------------------------------------------------------------------------------------|-----|-------------------------------|------------|---------|
| <a href="#">Prednisone Tablets</a>                 | Antiinflammatory | <b>Cadista</b> (1mg tablets 100 count and 1000 count, 5mg tablets 100 count and 1000 count, 10mg tablets 100 count and 1000 count, 20mg tablets 100 count and 500 count), <b>Roxane</b> (10mg tablets 100 count and 500 count, 20mg tablets 100 count and 500 count), <b>Qualitest</b> (1mg tablets 100 count and 1000 count, 2.5mg tablets 100 count, 5mg tablets 21 count, 48 count, 100 count, and 1000 count, 10mg tablets 21 count, 48 count, 100 count, 1000 count, 20mg tablets 100 count, 500 count, and 1000 count), <b>Watson</b> (5mg tablets 100 count and 1000 count, 10mg tablets 100 count, 500 count, and 1000 count, 20mg tablets 100 count, 500 count, and 1000 count), <b>West-Ward</b> (2.5mg tablets 100 count, 5mg tablets 100 count and 1000 count, 10mg tablets 100 count and 1000 count, 20mg tablets 100 count, 500 count, and 1000 count) | Yes | hydrocortisone, dexamethasone | 6/14/2012  | ongoing |
| <a href="#">Adenosine Injection</a>                | Cardiovascular   | <b>Bedford</b> (3mg/mL 2 mL vial 10 count and 4 mL vial 1 count), <b>Sagent</b> (3mg/mL 2 mL prefilled syringe 10 count, 4 mL prefilled syringe 10 count, 4 mL vial 10 count) <b>West-Ward</b> (3mg/mL 2 mL vial 10 count), <b>Wockhardt</b> (3mg/mL 4 mL vial 10 count)                                                                                                                                                                                                                                                                                                                                                                                                                                                                                                                                                                                             | Yes | none                          | 11/19/2012 | ongoing |
| <a href="#">Amiodarone Hydrochloride Injection</a> | Cardiovascular   | <b>APP</b> (50mg/mL injection 3 mL vials package of 10), <b>Hospira</b> (50mg/mL injection 3 mL ampules package of 10)                                                                                                                                                                                                                                                                                                                                                                                                                                                                                                                                                                                                                                                                                                                                               | Yes | none                          | 1/21/2011  | ongoing |

|                                                |                |                                                                                                                                                                                                                                                                                                                                                                                            |     |             |           |           |
|------------------------------------------------|----------------|--------------------------------------------------------------------------------------------------------------------------------------------------------------------------------------------------------------------------------------------------------------------------------------------------------------------------------------------------------------------------------------------|-----|-------------|-----------|-----------|
| <a href="#">Atropine Sulfate Injection</a>     | Cardiovascular | <b>Hospira</b> (0.05 mg/mL 5 mL Ansyrr syringe package of 10, 0.1 mg/mL 10 mL Ansyrr syringe package of 10, 0.1 mg/mL Lifeshield 21 gauge syringe package of 10, 0.1 mg/mL 5 mL Lifeshield syringe package of 10), <b>American Regent</b> (0.4 mg/mL 1mL single-dose vial package of 25, 1 mg/mL 1mL single-dose vial package of 25), <b>Amphastar</b> (0.1 mg/mL 10 mL Luer-Jet syringes) | Yes | none        | 8/2/2011  | ongoing   |
| <a href="#">Clevipidine Butyrate Injection</a> | Cardiovascular | <b>Medicines Company</b> (0.5mg/mL 50 mL and 100 mL vials)                                                                                                                                                                                                                                                                                                                                 | No  | nicardipine | 3/18/2010 | 1/4/2012  |
| <a href="#">Digoxin Injection</a>              | Cardiovascular | <b>GlaxoSmithKline</b> (0.25mg/mL injection 2mL ampule 10 count and 50 count, 0.1mg/mL 1 mL ampule 10 count)                                                                                                                                                                                                                                                                               | Yes | none        | 3/17/2011 | 4/19/2012 |
| <a href="#">Diltiazem Injection</a>            | Cardiovascular | <b>Bedford</b> (5mg/mL 5 mL, 10 mL, and 25 mL vials)                                                                                                                                                                                                                                                                                                                                       | Yes | verapamil   | 2/16/2012 | ongoing   |
| <a href="#">Dobutamine Injection</a>           | Cardiovascular | <b>Baxter</b> (100mg/250mL premix, 250mg/250mL premix, 500mg/250mL premix), <b>Bedford</b> (12.5mg/mL 20 mL vial), <b>Hospira</b> (12.5mg/mL 20 mL and 40 mL latex-free vials, 12.5mg/mL 20 mL vial 1 and 10 count, 12.5mg/mL 20 mL Novaplus vial, 1000mg/250mL premix)                                                                                                                    | Yes | none        | 6/22/2012 | ongoing   |

|                                                          |                |                                                                                                                                                                                                                                                                               |     |                                           |           |            |
|----------------------------------------------------------|----------------|-------------------------------------------------------------------------------------------------------------------------------------------------------------------------------------------------------------------------------------------------------------------------------|-----|-------------------------------------------|-----------|------------|
| <a href="#">Dopamine Injection</a>                       | Cardiovascular | <b>American Regent</b> (40mg/mL 5 mL vial, 80mg/mL 5 mL vial, 160mg/mL 5mL vial), <b>Bbraun</b> (5% injection in Dextrose 400mg/250mL), <b>Hospira</b> (5% injection in Detrose 200mg/250mL, 400mg/500mL, 400mg/250mL, 800mg/250mL, 800mg/500mL; 40mg/mL 5 mL and 10mL vials) | Yes | none                                      | 3/21/2011 | ongoing    |
| <a href="#">Enalaprilat Injection</a>                    | Cardiovascular | <b>Bedford</b> (1.25mg/mL 1 mL and 2 mL vials)                                                                                                                                                                                                                                | Yes | none                                      | 3/6/2012  | ongoing    |
| <a href="#">Epinephrine 0.1 mg/mL Emergency Syringes</a> | Cardiovascular | <b>Hospira</b> (0.1mg/mL emergency syringes), <b>Amphastar</b> (0.1mg/mL emergency syringes)                                                                                                                                                                                  | Yes | none                                      | 5/28/2010 | 12/6/2010  |
| <a href="#">Epinephrine Injection</a>                    | Cardiovascular | <b>American Regent</b> (1mg/mL 1mL ampule package of 25, 1mg/mL 30mL multidose vial package of 5), <b>Amphastar</b> (0.1mg/mL 10mL syringe package of 10, 1mg/mL 30 mL vial), <b>Hospira</b> (0.1 mg/mL 10 mL Lifeshield 18 gauge and 21 gauge glass syringes packages of 10) | Yes | none                                      | 5/3/2011  | ongoing    |
| <a href="#">Esmolol Injection</a>                        | Cardiovascular | <b>Bedford</b> (10mg/mL 10 mL single-dose vial package of 10)                                                                                                                                                                                                                 | Yes | metoprolol                                | 9/21/2011 | ongoing    |
| <a href="#">Hydralazine Injection</a>                    | Cardiovascular | <b>American Regent</b> (20mg/mL 1 mL vial)                                                                                                                                                                                                                                    | Yes | none                                      | 4/20/2011 | 11/30/2011 |
| <a href="#">Labetalol Injection</a>                      | Cardiovascular | <b>Bedford</b> (5mg/mL 20 mL and 40 mL vials), <b>Sagent</b> (5mg/mL 20 mL vials)                                                                                                                                                                                             | Yes | propranolol                               | 1/21/2011 | ongoing    |
| <a href="#">Lidocaine 2% Emergency Syringes</a>          | Cardiovascular | <b>Hospira</b> (2% emergency syringes)                                                                                                                                                                                                                                        | Yes | none                                      | 8/13/2010 | 11/16/2011 |
| <a href="#">Metoprolol Injection</a>                     | Cardiovascular | <b>American Regent</b> (1mg/mL 5mL vial 25 count), <b>Bedford</b> (1mg/mL 5 mL vial 10 count), <b>Hospira</b> (1mg/mL 5mL vial)                                                                                                                                               | Yes | atenolol, esmolol, labetalol, propranolol | 1/10/2008 | ongoing    |

|                                                       |                |                                                                                                                                                                                                                                                                                                             |     |             |            |         |
|-------------------------------------------------------|----------------|-------------------------------------------------------------------------------------------------------------------------------------------------------------------------------------------------------------------------------------------------------------------------------------------------------------|-----|-------------|------------|---------|
| <a href="#">Milrinone Injection</a>                   | Cardiovascular | <b>APP</b> (1mg/mL 20 mL and 50 mL vials), <b>Bedford</b> (1mg/mL 10 mL, 20 mL, and 50 mL vials, 0.2mg/mL 100 mL and 200 mL premixed bags), <b>Hospira</b> (0.2mg/mL 100 mL and 200 mL premixed bags), <b>West-Ward</b> (1mg/mL 50 mL vial, 0.2mg/mL 100 mL premixed bag)                                   | Yes | none        | 3/7/2011   | ongoing |
| <a href="#">Nicardipine Hydrochloride Injection</a>   | Cardiovascular | <b>Caraco</b> (2.5mg/mL 10 mL ampules), <b>Teva</b> (2.5mg/mL 10 mL vials), <b>Sandoz</b> (2.5mg/mL 10 mL vials), <b>American Regent</b> (2.5mg/mL 10 mL vials), <b>West-Ward</b> (2.5mg/mL 10 mL vials), <b>Cornerstone Therapeutics</b> (2.5mg/mL 10 mL ampules), <b>Wockhardt</b> (2.5mg/mL 10 mL vials) | Yes | clevidipine | 10/17/2008 | ongoing |
| <a href="#">Nitroglycerin Injection</a>               | Cardiovascular | <b>American Regent</b> (5mg/mL 10 mL vials package of 25), <b>Hospira</b> (10mg/100mL in Dextrose 5% 250 mL glass bottles, 10mg/100mL in Dextrose 5% 500 mL glass bottles, 20mg/100mL in Dextrose 5% 250 mL glass bottles, 40mg/100mL in Dextrose 5% 250 mL glass bottles)                                  | Yes | None        | 6/28/2012  | ongoing |
| <a href="#">Norepinephrine Injection</a>              | Cardiovascular | <b>Bedford</b> (1mg/mL 4 mL vial package of 10), <b>Hospira</b> (1mg/mL 4 mL vial package of 10), <b>Teva</b> (1mg/mL 4 mL vial package of 10)                                                                                                                                                              | Yes | None        | 3/2/2011   | ongoing |
| <a href="#">Phenylephrine Hydrochloride Injection</a> | Cardiovascular | <b>American Regent</b> (10mg/mL 1 mL and 5 mL vials)                                                                                                                                                                                                                                                        | Yes | None        | 2/11/2013  | ongoing |
| <a href="#">Procainamide Hydrochloride Injection</a>  | Cardiovascular | <b>Hospira</b> (500mg/mL 2 mL vials, 100mg/mL 10 mL vials)                                                                                                                                                                                                                                                  | No  | quinidine   | 11/28/2011 | ongoing |



|                                             |                |                                                                                                                                                                                                                                                                                                                   |     |                                        |            |           |
|---------------------------------------------|----------------|-------------------------------------------------------------------------------------------------------------------------------------------------------------------------------------------------------------------------------------------------------------------------------------------------------------------|-----|----------------------------------------|------------|-----------|
| <a href="#">Sotalol Hydrochloride</a>       | Cardiovascular | <b>Apotex</b> (80 mg, 120 mg, 160 mg, and 240 mg packages of 100),<br><b>Global Pharmaceuticals</b> (80mg, 120mg, 160mg packages of 100),<br><b>Upsher-Smith</b> (80mg, 120mg, 160mg, 240mg packages of 100),<br><b>Par</b> (80mg packages of 100 and 1000, 120mg packages of 100 and 1000, 160mg package of 100) | Yes | amiodarone,<br>dronedarone, dofetilide | 1/29/2010  | 9/2/2010  |
| <a href="#">Vasopressin Injection</a>       | Cardiovascular | <b>American Regent</b> (0.5 mL multidose vial 25 count, 1 mL multidose vial, 10 mL multidose vial)                                                                                                                                                                                                                | Yes | none                                   | 5/19/2011  | ongoing   |
| <a href="#">Verapamil Injection</a>         | Cardiovascular | <b>Hospira</b> (2.5mg/mL 2 mL ampule, 4 mL Ansyr syringe, and 4 mL vial)                                                                                                                                                                                                                                          | Yes | diltiazem                              | 12/12/2012 | ongoing   |
| <a href="#">Alteplase Recombinant</a>       | Coagulation    | <b>Genentech</b> (lyophilized powder 2mg vial 1 count)                                                                                                                                                                                                                                                            | Yes | reteplase, tenecteplase                | 2/27/2013  | ongoing   |
| <a href="#">Aminocaproic Acid Injection</a> | Coagulation    | <b>American Regent</b> (250mg/mL 20 mL vial), <b>Hospira</b> (250mg/mL 20 mL vial)                                                                                                                                                                                                                                | No  | tranexamic acid                        | 3/20/2013  | ongoing   |
| <a href="#">Argatroban Injection</a>        | Coagulation    | <b>Medicines Company</b> (1mg/mL 50 mL vials 1 count)                                                                                                                                                                                                                                                             | Yes | none                                   | 12/1/2011  | 6/21/2012 |
| <a href="#">Enoxaparin Injection</a>        | Coagulation    | <b>Sanofi-Aventis</b> (30mg/0.3mL, 40mg/0.4mL)                                                                                                                                                                                                                                                                    | Yes | dalteparin                             | 1/20/2011  | 3/16/2011 |

|                                                    |             |                                                                                                                                                                                                                                                                                                                                                                                                                                                                                                                                                                                                |     |                                        |            |           |
|----------------------------------------------------|-------------|------------------------------------------------------------------------------------------------------------------------------------------------------------------------------------------------------------------------------------------------------------------------------------------------------------------------------------------------------------------------------------------------------------------------------------------------------------------------------------------------------------------------------------------------------------------------------------------------|-----|----------------------------------------|------------|-----------|
| <a href="#">Heparin Sodium Injection</a>           | Coagulation | <b>APP</b> (1000unit/mL 1 mL multidosed vial, 10000unit/mL 1 mL multidose vial), <b>West-Ward</b> (1000unit/mL 2 mL vial, 1000unit/mL 30 mL vial, 5000unit/mL 2mL vial, 5000unit/mL 10 mL vial, 10000unit/mL 2 mL vial), <b>Hospira</b> (1000unit/mL 1 mL single dose glass vial, 1000unit/mL 10 mL and 30 mL multidose glass vials, 5000unit/mL 1mL glass vial, 10000unit/mL 0.5 mL Carpuject package of 50, 10000unit/mL 1 mL glass vial, 10000unit/mL 0.5 mL Carpuject Luer Lock Slim-Pak package of 10, 10000unit/mL iSecure syringe package of 10, <b>Sagent</b> (10000unit/mL 4 mL vial) | Yes | enoxaparin, dalteparin                 | 7/5/2012   | ongoing   |
| <a href="#">Phytonadione (Vitamin K) Injection</a> | Coagulation | <b>Amphastar</b> (1mg/0.5mL SAF-T-JET prefilled syringe)                                                                                                                                                                                                                                                                                                                                                                                                                                                                                                                                       | Yes | none                                   | 10/26/2011 | 6/11/2013 |
| <a href="#">Protamine Sulfate</a>                  | Coagulation | <b>APP</b> (10mg/mL 5 mL and 25 mL vials, 10mg/mL 5 mL and 25 mL Novaplus vials)                                                                                                                                                                                                                                                                                                                                                                                                                                                                                                               | No  | none                                   | 4/22/2011  | 3/8/2013  |
| <a href="#">Retepase Injection</a>                 | Coagulation | <b>Cornerstone Therapeutics</b> (one 10.4 unit single use vial, two 10.4 unit single use vials)                                                                                                                                                                                                                                                                                                                                                                                                                                                                                                | No  | alteplase, tenecteplase                | 10/9/2009  | ongoing   |
| <a href="#">Warfarin Sodium Tablets</a>            | Coagulation | <b>Bristol Myers Squibb</b> (Coumadin 1mg, 2mg, 2.5mg, 3mg, 4mg, 5mg, 6mg, 7.5mg, 10mg tablets)                                                                                                                                                                                                                                                                                                                                                                                                                                                                                                | Yes | none                                   | 4/20/2012  | 12/6/2012 |
| <a href="#">Acetazolamide Injection</a>            | Diuretic    | <b>Bedford</b> (500 mg vial)                                                                                                                                                                                                                                                                                                                                                                                                                                                                                                                                                                   | Yes | none                                   | 8/17/2010  | ongoing   |
| <a href="#">Furosemide Injection</a>               | Diuretic    | <b>Hospira</b> (10mg/mL 4 mL syringe), <b>American Regent</b> (10mg/mL 2 mL, 4 mL, and 10 mL vials), <b>APP</b> (10mg/mL 2 mL, 4 mL, and 10 mL vials)                                                                                                                                                                                                                                                                                                                                                                                                                                          | Yes | bumetanide, torsemide, ethacrynic acid | 6/20/2012  | ongoing   |

|                                                     |            |                                                                                                                                                                                                                                                                |     |                                         |            |           |
|-----------------------------------------------------|------------|----------------------------------------------------------------------------------------------------------------------------------------------------------------------------------------------------------------------------------------------------------------|-----|-----------------------------------------|------------|-----------|
| <a href="#">Mannitol Injection</a>                  | Diuretic   | <b>American Regent</b> (250mg/mL 50 mL vial 25 count), <b>APP</b> (250mg/mL 50 mL vial 25 count), <b>Hospira</b> (250mg/mL 50 mL vial 25 count)                                                                                                                | Yes | none                                    | 11/15/2011 | ongoing   |
| <a href="#">Torsemide Injection</a>                 | Diuretic   | <b>American Regent</b> (10mg/mL 2 mL and 5 mL vials)                                                                                                                                                                                                           | No  | furosemide, bumetanide, ethacrynic acid | 3/29/2012  | ongoing   |
| <a href="#">Famotidine Injection</a>                | GI         | <b>Bedford</b> (10mg/mL 2 mL, 4 mL, 20 mL, and 50 mL vials), <b>West-Ward</b> (20 mL vial)                                                                                                                                                                     | Yes | ranitidine                              | 8/15/2011  | ongoing   |
| <a href="#">Octreotide Injection</a>                | GI         | <b>Bedford</b> (50mcg/mL 1 mL vial, 100mcg/mL 1 mL vial, 500mg/mL 1 mL vial), <b>Sandoz</b> (200mcg/mL 5 mL vial, 1000mcg/mL 5 mL vial), <b>Teva</b> (50mcg/mL 1 mL vial, 100 mcg/mL 1 mL vial, 500mcg/mL 1 mL vial, 200mcg/mL 5mL vial, 1000mcg/mL 5 mL vial) | Yes | None                                    | 6/6/2011   | ongoing   |
| <a href="#">Pantoprazole Injection</a>              | GI         | <b>Pfizer</b> (Protonix injection 40mg vial)                                                                                                                                                                                                                   | Yes | esomeprazole                            | 2/15/2012  | 7/26/2012 |
| <a href="#">Ranitidine Injection</a>                | GI         | <b>Bedford</b> (25mg/mL 2 mL, 6 mL, and 40 mL vials), <b>Covis</b> (1mg/mL 50 mL premixed bag), <b>GlaxoSmithKline</b> (25mg/mL 2 mL, 6 mL, and 40 mL vials)                                                                                                   | Yes | famotidine                              | 8/17/2011  | ongoing   |
| <a href="#">Fosphenytoin Injection</a>              | Neurologic | <b>Hospira</b> (75mg/mL 2 mL vial 25 count, 75mg/mL 10 mL vial 10 count), <b>West-Ward</b> (75mg/mL 2 mL and 10 mL vials)                                                                                                                                      | Yes | phenytoin                               | 5/28/2010  | ongoing   |
| <a href="#">Levetiracetam Injection</a>             | Neurologic | <b>UCB</b> (100mg/mL injection)                                                                                                                                                                                                                                | Yes | none                                    | 2/26/2010  | 7/19/2010 |
| <a href="#">Neostigmine Methylsulfate Injection</a> | Neurologic | <b>American Regent</b> (0.5mg/mL 10 mL vial)                                                                                                                                                                                                                   | Yes | edrophonium, pyridostigmine             | 3/2/2011   | ongoing   |
| <a href="#">Phenytoin Injection</a>                 | Neurologic | <b>Hospira</b> (50mg/mL 2 mL Carpuject syringe and 5 mL ampule)                                                                                                                                                                                                | Yes | fosphenytoin                            | 3/3/2011   | ongoing   |
| <a href="#">Pyridostigmine Bromide Injection</a>    | Neurologic | <b>Sandoz</b> (5mg/mL 2 mL ampules)                                                                                                                                                                                                                            | No  | edrophonium, neostigmine                | 3/2/2011   | 5/31/2013 |

|                                                                                             |                       |                                                                                                                                                                                                                                                                                                                                                    |     |                   |            |         |
|---------------------------------------------------------------------------------------------|-----------------------|----------------------------------------------------------------------------------------------------------------------------------------------------------------------------------------------------------------------------------------------------------------------------------------------------------------------------------------------------|-----|-------------------|------------|---------|
| <a href="#">Valproate Sodium Injection</a>                                                  | Neurologic            | <b>Bedford</b> (100mg/mL 5 mL vials)                                                                                                                                                                                                                                                                                                               | Yes | none              | 4/14/2011  | ongoing |
| <a href="#">Amino Acid Products</a>                                                         | Nutrition/Electrolyte | <b>Baxter</b> (Travason 10% 1000 mL, Prosol 20% 2000 mL sulfite-free), <b>Bbraun</b> (Amino acid 15% solution 1000 mL, FreAmine III 10% 1000 mL, HeparAmine 8% 500 mL, NephroAmine 5.4% 250 mL, ProcalAmine 1000 mL), <b>Hospira</b> (Aminosyn 8.5% with electrolytes 500 mL sulfite-free, Aminosyn II 8.5% with electrolytes 500 mL sulfite-free) | Yes | none              | 9/9/2013   | ongoing |
| <a href="#">Amino Acid Products with Electrolytes in Dextrose with Calcium (Clinimix E)</a> | Nutrition/Electrolyte | <b>Baxter</b> (Clinimix E)                                                                                                                                                                                                                                                                                                                         | Yes | none              | 5/10/2013  | ongoing |
| <a href="#">Calcium Chloride Injection</a>                                                  | Nutrition/Electrolyte | <b>American Regent</b> (100mg/mL 10 mL vial), <b>Calcium Chloride</b> (100mg/mL 10 mL LifeShield syringe and 10 mL Ansyr syringe)                                                                                                                                                                                                                  | Yes | calcium gluconate | 4/29/2011  | ongoing |
| <a href="#">Calcium Gluconate Injection</a>                                                 | Nutrition/Electrolyte | <b>American Regent</b> (100mg/mL 50 mL and 100 mL vials), <b>APP</b> (100mg/mL 10 mL, 50 mL, and 100 mL vials)                                                                                                                                                                                                                                     | No  | calcium chloride  | 11/9/2012  | ongoing |
| <a href="#">Intravenous Fat Emulsion</a>                                                    | Nutrition/Electrolyte | <b>Hospira</b> (10% 250 mL and 500 mL, 20% 250 mL and 500 mL, 30% 500 mL), <b>Baxter</b> (20% 100 mL, 250 mL, 500 mL, and 1000 mL, 30% 500 mL)                                                                                                                                                                                                     | No  | none              | 10/26/2009 | ongoing |

|                                                             |                       |                                                                                                                                                                                                                                                                                                      |     |                   |           |           |
|-------------------------------------------------------------|-----------------------|------------------------------------------------------------------------------------------------------------------------------------------------------------------------------------------------------------------------------------------------------------------------------------------------------|-----|-------------------|-----------|-----------|
| <a href="#">Magnesium Sulfate Injection</a>                 | Nutrition/Electrolyte | <b>American Regent</b> (500mg/mL 2 mL, 10 mL, and 50 mL vials), <b>APP</b> (500mg/mL 2 mL, 10 mL, 20 mL, and 50 mL vials), <b>Hospira</b> (10mg/mL 100 mL premixed bag, 40mg/mL 50 mL, 100 mL, 500 mL, and 1000 mL premixed bags, 80mg/mL 50 mL premixed bag, 500mg/mL 10 mL syringe and 20 mL vial) | No  | none              | 12/7/2011 | ongoing   |
| <a href="#">Potassium Chloride Injection</a>                | Nutrition/Electrolyte | <b>APP</b> (2mEq/mL 30mEq/15mL vials package of 25), <b>Baxter</b> (10mEq/1000mL in 5% dextrose, 20mEq/1000mL in 5% dextrose and 0.9% sodium chloride, 20mEq/1000 mL in 0.9% sodium chloride, 20mEq/1000mL in 5% dextrose and 0.45% sodium chloride, 20mEq/1000mL in 0.45% sodium chloride)          | Yes | potassium acetate | 2/28/2012 | ongoing   |
| <a href="#">Diphenhydramine Hydrochloride for Injection</a> | Other                 | <b>Hospira</b> (50mg/mL)                                                                                                                                                                                                                                                                             | Yes | none              | 10/5/2011 | 3/11/2013 |
| <a href="#">Glucagon Injection</a>                          | Other                 | <b>Bedford</b> (GlucaGen injection, GlucaGen diagnostic kit)                                                                                                                                                                                                                                         | Yes | none              | 8/10/2010 | 3/14/2011 |
| <a href="#">Glycopyrrolate Injection</a>                    | Other                 | <b>American Regent</b> (0.2mg/mL 1 mL, 2 mL, 5 mL, and 20 mL vials), <b>West-Ward</b> (0.2mg/mL 1 mL, 2 mL, 5 mL, and 20 mL vials)                                                                                                                                                                   | No  | atropine          | 2/7/2011  | ongoing   |
| <a href="#">Naloxone Injection</a>                          | Other                 | <b>Hospira</b> (0.4mg/mL)                                                                                                                                                                                                                                                                            | Yes | none              | 9/2/2011  | 7/29/2013 |

|                                                      |           |                                                                                                                                                                                                                                                                                                                                                                                                                        |     |                                                                     |           |          |
|------------------------------------------------------|-----------|------------------------------------------------------------------------------------------------------------------------------------------------------------------------------------------------------------------------------------------------------------------------------------------------------------------------------------------------------------------------------------------------------------------------|-----|---------------------------------------------------------------------|-----------|----------|
| <a href="#">Ondansetron Injection</a>                | Other     | <b>Baxter</b> (32mg/50mL premixed bags), <b>Bedford</b> (2mg/mL 20 mL vial, 32mg/50mL premixed bags), <b>Claris</b> (32mg/50mL premixed bags), <b>Hospira</b> (2mg/mL 20 mL vial, 32mg/50mL premixed bags), <b>Pfizer</b> (2mg/mL 2 mL vials package of 25), <b>Teva</b> (2mg/mL 20 mL vials and 20 mL vials packages of 10, 32mg/50mL premixed bags), <b>Wockhardt</b> (2mg/mL 2 mL vials packages of 5, 20 mL vials) | Yes | granisetron                                                         | 1/21/2011 | ongoing  |
| <a href="#">Prochlorperazine Edisylate Injection</a> | Other     | <b>Bedford</b> (5mg/mL 10 mL vial)                                                                                                                                                                                                                                                                                                                                                                                     | Yes | promethazine                                                        | 9/22/2011 | 5/3/2013 |
| <a href="#">Atracurium Injection</a>                 | Paralytic | <b>Bedford</b> (5 mL single dose vial and 10 mL multi-dose vial)                                                                                                                                                                                                                                                                                                                                                       | Yes | cisatracurium, pancuronium, rocuronium, succinylcholine, vecuronium | 2/27/2012 | ongoing  |
| <a href="#">Pancuronium Injection</a>                | Paralytic | <b>Hospira</b> (1mg/mL 10 mL vial package of 25)                                                                                                                                                                                                                                                                                                                                                                       | No  | atracurium, cisatracurium, pancuronium, rocuronium, succinylcholine | 5/7/2010  | ongoing  |
| <a href="#">Rocuronium Injection</a>                 | Paralytic | <b>APP</b> (10mg/mL 10 mL vials package of 10), <b>Hospira</b> (10mg/mL 5 mL vials package of 10, 10mg/mL 10 mL vials package of 10), <b>Sandoz</b> (10mg/mL 5 mL vials package of 10), <b>Teva</b> (10mg/mL 5 mL and 10 mL vials packages of 10), <b>Merck</b> (10mg/mL 10 mL package of 10)                                                                                                                          | Yes | atracurium, cisatracurium, pancuronium, succinylcholine, vecuronium | 9/3/2013  | ongoing  |
| <a href="#">Succinylcholine chloride Injection</a>   | Paralytic | <b>Hospira</b> (10mg/mL 10 mL vial)                                                                                                                                                                                                                                                                                                                                                                                    | Yes | atracurium, cisatracurium, pancuronium, rocuronium, vecuronium      | 8/12/2013 | ongoing  |

|                                                    |           |                                                                                                                                                                                    |     |                                                                     |            |         |
|----------------------------------------------------|-----------|------------------------------------------------------------------------------------------------------------------------------------------------------------------------------------|-----|---------------------------------------------------------------------|------------|---------|
| <a href="#">Vecuronium Bromide Injection</a>       | Paralytic | <b>Bedford</b> (10 mg and 20 mg vials packages of 10), <b>Hospira</b> (10 mg vials package of 10), <b>Teva</b> (10 mg and 20 mg vials packages of 10), <b>Sagent</b> (10 mg vials) | Yes | atracurium, cisatracurium, pancuronium, rocuronium, succinylcholine | 8/8/2013   | ongoing |
| <a href="#">Diazepam Injection</a>                 | Sedative  | <b>Hospira</b> (5mg/mL 2 mL Carpuject Luer-Lock syringes package of 10 and 10 mL vials package of 10)                                                                              | Yes | lorazepam, midazolam                                                | 12/22/2011 | ongoing |
| <a href="#">Droperidol Injection</a>               | Sedative  | <b>American Regent</b> (2.5mg/mL 2 mL vials), <b>Hospira</b> (2.5mg/mL 2 mL ampule)                                                                                                | No  | none                                                                | 8/15/2011  | ongoing |
| <a href="#">etomidate Injection</a>                | Sedative  | <b>American Regent</b> (2mg/mL 10 mL and 20 mL vials), <b>Bedford</b> (2mg/mL 10 mL and 20 mL vials), <b>Mylan</b> (2mg/mL 20 mL vial)                                             | Yes | none                                                                | 7/6/2011   | ongoing |
| <a href="#">Ketamine Injection</a>                 | Sedative  | <b>Bedford</b> (50mg/mL 10 mL vial package of 10)                                                                                                                                  | Yes | none                                                                | 1/31/2012  | ongoing |
| <a href="#">Lorazepam injectable presentations</a> | Sedative  | <b>Hospira</b> (2mg/mL 10 mL vial, 4mg/mL 1 mL and 10 mL vials, 4mg/mL 1mL Carpuject syringe), <b>Ativan</b> (4mg/mL 1 mL and 10 mL vials)                                         | Yes | diazepam, midazolam                                                 | 4/8/2011   | ongoing |

|                                      |          |                                                                                                                                                                                                                                                                                                                                                                                                                                                                                                                                                                                                               |     |                     |            |         |
|--------------------------------------|----------|---------------------------------------------------------------------------------------------------------------------------------------------------------------------------------------------------------------------------------------------------------------------------------------------------------------------------------------------------------------------------------------------------------------------------------------------------------------------------------------------------------------------------------------------------------------------------------------------------------------|-----|---------------------|------------|---------|
| <a href="#">Midazolam Injections</a> | Sedative | <b>Akorn</b> (1mg/mL 2mL vials 25 count, 1mg/mL 5 mL vials 10 count, 5mg/mL 1 mL vials 25 count), <b>APP</b> (1mg/mL 5 mL vials 25 count), <b>Bedford</b> (1mg/mL 2 mL and 5 mL vials 10 count, 1mg/mL 10 mL vials 10 count, 5mg/mL 1 mL, 2 mL, 5 mL, and 10 mL vials 10 count), <b>Hospira</b> (1mg/mL 5mL vials 10 count, 1mg/mL 10 mL vial, 5mg/mL 1mL vial, 5mg/mL 1mL Luer-Lock syringe 10 count, 5mg/mL 10 mL vial 10 count), <b>Sagent</b> (1mg/mL 10 mL vial), <b>West-Ward</b> (1mg/mL 2 mL vial 10 count, 1mg/mL 2 mL dosette vial, 1mg/mL 5 mL vial 10 count, 1mg/mL 2mL latex free vial 10 count) | Yes | diazepam, lorazepam | 12/14/2011 | ongoing |
| <a href="#">Propofol Injection</a>   | Sedative | <b>APP</b> (10mg/mL 20 mL, 50 mL, and 100 mL vial, 10mg/mL 50 mL and 100 mL Novaplus vial)                                                                                                                                                                                                                                                                                                                                                                                                                                                                                                                    | Yes | none                | 10/28/2009 | ongoing |

**Business and Continuity of Operations online appendix  
Summary prepared November 2013**

Jeffrey R Dichter, MD, who was both a topic editor and executive committee member, prepared this summary.

The original 13 questions defined by the Business and Continuity of Operations Panel at the June 2012 meeting are listed below:

**Business and Continuity of Operations- Summary of Key Questions**

1. What are the implications of the fully globalized supply chain that the critical care practitioner must be aware of when planning for both their day-to-day continuity of operations as well as during a disaster.
  - a. This issue is really the “NEW” level of MASS casualty disaster eg/a global shortage of critical care supplies, global system failure due to global supply chain failure



2. How can health care coalitions or governments interface with private providers of essential supplies to strategically distribute scarce resources?
3. What consequences do the differential duration of a disaster's impact on critical care and surgical operations' (eg. as opposed to on emergency departments) have on the planning assumptions and preparations for continuity of operations in these areas?
4. How can academic medical centers and other large health systems be leveraged to support disaster response?
  - a. NC State SMAT program
  - b. Integration into system
5. What are the key business and continuity of operations considerations for systems and individual critical care providers responding to a disaster or suffering from a disaster.
6. What are the finance issues and potential management mechanisms that must be considered when your institution is struck by a disaster?
  - a. Credentialing surge staff with payer
  - b. Documentation necessary for billing
  - c. Cash flow issues for hospitals while awaiting reimbursement
  - d. Agreements with CMS/payer prior to event
  - e. Domestic vs Intl response & payment
  - f. Displaced uninsured persons into hospital catchment area
7. What the implications of an EHR based system on provision of mass critical care
  - a. Surge capacity
  - b. Unique identifiers (patient transfer/evac implications)
  - c. Infrastructure vulnerability
  - d. System Failure (paper backup process but sig bottlenecks)
  - e. Equipment data capture outside of the ICU
8. What special considerations are required regarding hospital/critical care unit relationships with vendors related to disaster preparedness/response?
  - a. Different facilities double counting surge supplies
  - b. Sole source supply chain issues
9. What questions must critical care systems ask of their key partners regarding their partners' disaster preparedness?
  - a. Eg. Plan is to off-load to long-term vent centre, these places seeing themselves as low acuity institutions may not have robust emerg prep plan therefore causing the ICU's plan to fail
10. What are the considerations for critical care health human resources in preparing for or responding to a disaster?
11. Staffing vulnerabilities (positions staffed only 1 or 2 deep)
  - a. Care of family members/pets etc
  - b. Retention of staff post disaster
  - c. This question may go better under Surge
12. Essential Services
  - a. Engineered failure
  - b. What will be provided vs what won't
  - c. Communication of both what isn't AND is being provided to the community

### 13. Stockpile issues

- a. Stockpile/inventory mgmt
- b. Coordination
- c. Deployment for non-local disasters (eg international)

### **Business and Continuity of Operations Panelists**

Pritish Tosh  
Henry Feldman  
Michael Christian  
Jeffrey Dichter  
Martha Bartz  
Bruce Cairns  
Deborah Levy  
Preston Rich  
Babak Sarani  
John Wilgis

Based on the above key questions, the Business and Continuity of Operations Panel was divided into 2 working groups, with focus on Medication and medical supply chain vulnerability, and information technology (IT) vulnerability in a disaster.

### **Medication and medical supply chain vulnerability**

Initial literature searches were performed using the following search terms: shortages, medical supply chain, medications, drugs, and medical supplies.  
Timeframe: 2008 to February 2013

145 articles were found, and reviewed by Dr. Tosh and Dr. Dichter. 109 articles were felt to be relevant and all were pulled and reviewed.

There were no articles found in these literature searches felt to provide significant high-grade data addressing the key questions.

### **Information Technology Vulnerability**

Initial literature searches were performed using the following search Terms:

Disaster preparedness health information technology (HIT)  
Disaster preparedness informatics  
Disaster preparedness electronic health record (EHR)  
Disaster management HIT  
Disaster EHR  
Mass casualty EHR  
Mass casualty informatics

Timeframe: 2008 to March 2013

Dr. Feldman and Dr. Dichter reviewed literature searches, and 10 articles were pulled and reviewed. Unfortunately, these searches were not kept nor were the total number of articles reviewed recorded. Of note, these seven search terms were entered into PubMed in November 2013, and 370 articles were obtained, which is a reasonable estimate of the number of articles actually reviewed in March 2013.

There were no articles found in these literature searches felt to provide significant high-grade data addressing the key questions.

**Addendum regarding suggestions 19-21, which were omitted from the final manuscript.**

The following 3 suggestions (19-21) were passed by  $\geq 80\%$  of the task force during the Delphi process first round. However, at the topic editors face-to-face Chicago meeting in April 2013 (between rounds 1 and 2), the Topic Editors felt that the Task Force felt did not have sufficient IT expertise to warrant these suggestions being included. It was decided at this meeting that they would be withdrawn as suggestions, but included in the manuscript's on-line supplemental material.

**Original Delphi Suggestion 19:** We suggest hospitals should have spare servers for a years worth of operations (these can be non-critical function servers that can be repurposed).

**Original Delphi Suggestion 20:** We suggest in an extended disaster (such as post-hurricane Katrina) plans need to be in place to continue computer support for patient care, finance, education, research operations, etc. from an IT standpoint, with sufficient storage and servers for anticipated growth.

**Original Delphi Suggestions 21:** We suggest hospitals and health systems inventory all computer systems that can be cannibalized in the setting of extreme shortage. Plans should be made for long-term relief of the effected systems in these non-critical areas to support long-term continuity.
